# Supplementary material
Source: publisher figshare collection journal article supplement (https://frontiersin.figshare.com/ndownloader/files/15428426)
Supplement: Supplementary file [file 15428426]

**PLEASE COMPLETE THE FOLLOWING SURVEY BY FILLING IN THE BLANKS PROVIDED. Some questions will require you to check the box associated with your response. FOR QUESTIONS, please contact either Dr. Nwankwor at [odiraa.nwankwor@nemours.org](mailto:odiraa.nwankwor@nemours.org) or the Data Manager, Krystal Hunter at [hunter-krystal@cooperhealth.edu](mailto:hunter-krystal@cooperhealth.edu).**

1. What is your title?

- ☐ Consultant Pediatrician
- ☐ Senior Registrar - Pediatrics
- ☐ Registrar - Pediatrics
- ☐ House Officer - Pediatrics
- ☐ Medical Officer
- ☐ Other (please specify)

2. Healthcare Facility affiliation

- ☐ Federal Government
- ☐ State Government

3. Type of healthcare facility

- ☐ Teaching Hospital
- ☐ Federal Medical Center
- ☐ Other (please specify)

## Sepsis Survey

### Important barriers to appropriate sepsis therapy in your setting:

4. In the area where you practice, think about the most important barriers to appropriate sepsis therapy for children. Mark how strongly you agree/disagree with the following as barriers to sepsis therapy.

|                                                       | Strongly Disagree     | Disagree              | Neutral               | Agree                 | Strongly Agree        |
|-------------------------------------------------------|-----------------------|-----------------------|-----------------------|-----------------------|-----------------------|
| Deficits in parental education                        | <input type="radio"/> | <input type="radio"/> | <input type="radio"/> | <input type="radio"/> | <input type="radio"/> |
| Access to health care services                        | <input type="radio"/> | <input type="radio"/> | <input type="radio"/> | <input type="radio"/> | <input type="radio"/> |
| Lack of medical equipment resources                   | <input type="radio"/> | <input type="radio"/> | <input type="radio"/> | <input type="radio"/> | <input type="radio"/> |
| Lack of vascular access and crystalloid resuscitation | <input type="radio"/> | <input type="radio"/> | <input type="radio"/> | <input type="radio"/> | <input type="radio"/> |
| Lack of antibiotics                                   | <input type="radio"/> | <input type="radio"/> | <input type="radio"/> | <input type="radio"/> | <input type="radio"/> |
| Failure to diagnose sepsis by referring facilities    | <input type="radio"/> | <input type="radio"/> | <input type="radio"/> | <input type="radio"/> | <input type="radio"/> |
| Not enough trained hospital person                    | <input type="radio"/> | <input type="radio"/> | <input type="radio"/> | <input type="radio"/> | <input type="radio"/> |
| No defined protocol for managing pediatric sepsis     | <input type="radio"/> | <input type="radio"/> | <input type="radio"/> | <input type="radio"/> | <input type="radio"/> |
| Long triage waiting times                             | <input type="radio"/> | <input type="radio"/> | <input type="radio"/> | <input type="radio"/> | <input type="radio"/> |

5. What other barriers exist for delivering sepsis therapy to children? List them below

ACUTE CARE/EMERGENCY MANAGEMENT AREA (FIRST CONTACT WITH HOSPITAL)

6. Is there an acute care area or emergency management area where acutely ill/injured children are managed?

☐ Yes

☐ No

7. Is the paediatric acute care area separate from the adult area?

☐ Yes

☐ No

8. How many hours/day is the pediatric acute care area functional?

9. Is the acute care area open on weekends?

☐ Yes

☐ No

10. Is there a system to screen and prioritize very sick children?

☐ Yes

☐ No

11. Who is responsible for prioritizing?

☐ Pediatric Specialists/Consultants

☐ Pediatric Residents

☐ General Physicians

☐ Medical Officers

☐ Interns

☐ Nurses

☐ Nursing Aides

☐ Other

12. What is the average time from arrival to prioritization?(Please list time and units)

13. What is the average time (units below) from prioritization to being seen by a physician:(Please list time and units)

14. Are any specific guidelines used for prioritization:

|                                                                                        | Yes                   | No                    |
|----------------------------------------------------------------------------------------|-----------------------|-----------------------|
| IMCI (Integrated Management of Childhood Illnesses)                                    | <input type="radio"/> | <input type="radio"/> |
| ETAT (Emergency Triage Assessment and Treatment)                                       | <input type="radio"/> | <input type="radio"/> |
| APLS (Advanced Pediatric Life Support)                                                 | <input type="radio"/> | <input type="radio"/> |
| ACCM/PALS (American College of Critical Care Medicine/Pediatric Advanced Life Support) | <input type="radio"/> | <input type="radio"/> |
| Other                                                                                  | <input type="radio"/> | <input type="radio"/> |

15. If you stated "Other" in the above question, can you specify the other guidelines?

\* 16. Are children with suspected sepsis given emergency priority?

☐ Yes

☐ No

17. Describe how these children are given priority.

\* 18. Are the staff trained in screening and prioritization of the severely ill children?

☐ Yes

☐ No

## 19. What specific training do they received?

|                                                                                        | Yes                   | No                    |
|----------------------------------------------------------------------------------------|-----------------------|-----------------------|
| IMCI (Integrated Management of Childhood Illnesses)                                    | <input type="radio"/> | <input type="radio"/> |
| ETAT (Emergency Triage Assessment and Treatment)                                       | <input type="radio"/> | <input type="radio"/> |
| APLS (Advanced Pediatric Life Support)                                                 | <input type="radio"/> | <input type="radio"/> |
| ACCM/PALS (American College of Critical Care Medicine/Pediatric Advanced Life Support) | <input type="radio"/> | <input type="radio"/> |
| Other training                                                                         | <input type="radio"/> | <input type="radio"/> |

## 20. If you stated that you received other training, can you specify?

PEDIATRIC WARD/INPATIENT AREA (HOSPITALIZED CHILDREN)

21. How many total pediatric beds are in the facility?

\* 22. Are there specific beds designated for acutely ill children on the unit/ward?

☐ Yes

☐ No

23. How many?

24. Are these beds located on the ward?

☐ Yes

☐ No

25. Are these beds located in a designated pediatric ICU?

☐ Yes

☐ No

26. Do you have an infectious disease (isolation) ward?

☐ Yes

☐ No

27. Do patients come with referral notes when they have been referred from first level units?

☐ Never

☐ Sometimes

☐ Often

☐ Most of the time

☐ Always

28. Comments:



### What is the distribution of ward staff ?

29. Is there a physician on call 24 hours?

☐ Yes

☐ No

30. Who is the frontline care provider?

☐ Pediatric Specialists/Consultants

☐ Pediatric residents

☐ General physicians

☐ Interns

☐ Medical Officer

☐ Other (please specify)

31. Who receives the new patients on the ward?

☐ Pediatric Specialists/Consultants

☐ Pediatric Residents

☐ General Physicians

☐ Medical Officers

☐ Interns

☐ Nurses

☐ Nursing Aides

☐ Other (please specify)

32. DESCRIBE what would happen to a child with suspected SEPSIS sent to ER and the ward/ICU **within an hour:**

|                                  | Yes                   | No                    |
|----------------------------------|-----------------------|-----------------------|
| Vascular access obtained         | <input type="radio"/> | <input type="radio"/> |
| Crystalloid bolus given          | <input type="radio"/> | <input type="radio"/> |
| Antibiotics given                | <input type="radio"/> | <input type="radio"/> |
| Central Line started             | <input type="radio"/> | <input type="radio"/> |
| Arterial line started            | <input type="radio"/> | <input type="radio"/> |
| Blood cultures sent              | <input type="radio"/> | <input type="radio"/> |
| Chest X-Ray obtained             | <input type="radio"/> | <input type="radio"/> |
| Blood gas obtained               | <input type="radio"/> | <input type="radio"/> |
| Attending physician sees patient | <input type="radio"/> | <input type="radio"/> |

33. Who sees the patient first?

- ☐ Pediatric Specialists/Consultants
- ☐ Pediatric Residents
- ☐ General Physicians
- ☐ Medical Officers
- ☐ Interns
- ☐ Nurses
- ☐ Nursing Aides
- ☐ Other (please specify)

34. Who reviews the patient?

- ☐ Pediatric specialists
- ☐ Pediatric residents
- ☐ General physicians
- ☐ Medical Officers
- ☐ Interns
- ☐ Nurses
- ☐ Nursing Aides
- ☐ Other (please specify)

35. How is the child's severity of illness determined?

- ☐ Physical exam alone
- ☐ Algorithm (IMCI or ETAT)
- ☐ Institutional protocol
- ☐ Scoring system
- ☐ Lab values
- ☐ Other (please specify)

36. Who is responsible for achieving vascular access?

- ☐ Pediatric Specialists/Consultants
- ☐ Pediatric Residents
- ☐ General Physicians
- ☐ Medical Officers
- ☐ Interns
- ☐ Nurses
- ☐ Nursing Aides
- ☐ Other (please specify)

37. Who is responsible for administering crystalloid boluses?

- ☐ Pediatric Specialists/Consultants
- ☐ Pediatric Residents
- ☐ General Physicians
- ☐ Medical Officers
- ☐ Interns
- ☐ Nurses
- ☐ Nursing Aides
- ☐ Other (please specify)

38. What PERCENTAGE of patients with sepsis receive IV fluid resuscitation according to the PALS/ACCM guidelines? [up to and over 60ml/kg in the first 15 minutes titrated to improved perfusion and evaluating for development of rales/hepatomegaly]

39. Who prescribes antibiotics?

- ☐ Pediatric specialists/Consultants
- ☐ Pediatric Residents
- ☐ General Physicians
- ☐ Interns
- ☐ Medical Officer
- ☐ Other (please specify)

40. Which antibiotics are most commonly used for sepsis?

- ☐ Ampicillin
- ☐ Penicillin
- ☐ Vancomycin
- ☐ Ceftriaxone
- ☐ Gentamicin
- ☐ Chloramphenicol
- ☐ Other: Quinine, Coartemisin

41. What percentage of pediatric patients with sepsis receives antibiotics:

Within 1 hour

Within 2 hours

42. What labs are usually ordered for a patient with sepsis?

- ☐ Complete blood count
- ☐ Chemistry
- ☐ Blood gas
- ☐ Coagulation profile
- ☐ Urinalysis
- ☐ Blood smear for malaria
- ☐ Other
- ☐ Other additional
- ☐ Specify Other lab test and additional other lab tests

43. Blood cultures

What percentage of patients have a blood culture obtained

What percentage of blood cultures yield an isolate that is helpful for patient management?

\* 44. If a patient becomes severely ill, are they transferred to another area?

☐ Yes

☐ No

45. Where are they transferred?

- ☐ Intensive care unit
- ☐ Another hospital
- ☐ Other (please specify)

46. What equipment is available for patient monitoring?

|                        | Yes                   | No                    |                       |                       |                       |
|------------------------|-----------------------|-----------------------|-----------------------|-----------------------|-----------------------|
| Cardiac monitor        | <input type="radio"/> | <input type="radio"/> | <input type="radio"/> | <input type="radio"/> | <input type="radio"/> |
| Pulse oximeter         | <input type="radio"/> | <input type="radio"/> | <input type="radio"/> | <input type="radio"/> | <input type="radio"/> |
| Blood pressure machine | <input type="radio"/> | <input type="radio"/> | <input type="radio"/> | <input type="radio"/> | <input type="radio"/> |
| Other                  | <input type="radio"/> | <input type="radio"/> | <input type="radio"/> | <input type="radio"/> | <input type="radio"/> |

Specify other equipment

47. Are there any specific guidelines used when treating a child with sepsis?

- ☐ Yes
- ☐ No

48. Which guidelines are used?

49. What goals are used to direct sepsis therapy?

|                               | Yes                   | No                    |
|-------------------------------|-----------------------|-----------------------|
| Reduction in Heart rate       | <input type="radio"/> | <input type="radio"/> |
| Improvement in blood pressure | <input type="radio"/> | <input type="radio"/> |
| Improvement in mental status  | <input type="radio"/> | <input type="radio"/> |
| Urine Output                  | <input type="radio"/> | <input type="radio"/> |
| Improved peripheral perfusion | <input type="radio"/> | <input type="radio"/> |
| Serum markers (lactate, SVO2) | <input type="radio"/> | <input type="radio"/> |

Other Goals:



## SEPSIS STATISTICS IN YOUR INSTITUTION

50. What types of patients are seen in this area? (please list ages, diagnoses, etc)

Youngest Age (In years)

Oldest Age (In Years)

51. What events do you serve?

|                      | Yes                   | No                    |
|----------------------|-----------------------|-----------------------|
| Medical emergencies  | <input type="radio"/> | <input type="radio"/> |
| Trauma               | <input type="radio"/> | <input type="radio"/> |
| Surgical emergencies | <input type="radio"/> | <input type="radio"/> |

52. What are the common comorbidities that exist in patients with sepsis?

|              | Yes                   | No                    |
|--------------|-----------------------|-----------------------|
| Tuberculosis | <input type="radio"/> | <input type="radio"/> |
| Malnutrition | <input type="radio"/> | <input type="radio"/> |
| Other        | <input type="radio"/> | <input type="radio"/> |

Specify other comorbidity:

53. What organism(s) is/are responsible for most childhood deaths due to sepsis - BACTERIAL?

- ☐ Streptococcus pneumoniae
- ☐ Group A Strep
- ☐ Staphylococcus aureus
- ☐ Gram negative rods
- ☐ Other
- ☐ Specify "other" bacteria:

54. What organism(s) is/are responsible for most childhood deaths due to sepsis - VIRAL? (Please list)

55. What organism(s) is/are responsible for most childhood deaths due to sepsis - PROTOZOAL?

☐

Malaria

☐

Other

☐

Specify "other" Protozoa:

56. What organism(s) is/are responsible for most childhood deaths due to sepsis - FUNGAL? (Please list)

57. Please define how many time the below happened in the previous calendar year (January to December 2016)?

Patient visits

Patient visits to the  
emergency department

Patients evaluated for  
sepsis in the emergency  
department

Inpatient Admissions

Inpatient admissions with a  
primary diagnosis of  
sepsis

Inpatient Deaths

## RESUSCITATION FACILITIES: DRUGS AND OTHER SUPPLIES

Indicate if the following items are available in the Acute Care/ Emergency Area and in the Pediatric ward. Provide any additional remarks.

58. Job aides/guidelines for management of childhood emergencies:

|                            | Available             | Not Available         | Available but not functional |
|----------------------------|-----------------------|-----------------------|------------------------------|
| Acute care/ Emergency Area | <input type="radio"/> | <input type="radio"/> | <input type="radio"/>        |
| Pediatric ward             | <input type="radio"/> | <input type="radio"/> | <input type="radio"/>        |

Remarks

59. EQUIPMENT & SUPPLIES: Resuscitation Table

|                            | Available             | Not Available         | Available but not functional |
|----------------------------|-----------------------|-----------------------|------------------------------|
| Acute care/ Emergency Area | <input type="radio"/> | <input type="radio"/> | <input type="radio"/>        |
| Pediatric ward             | <input type="radio"/> | <input type="radio"/> | <input type="radio"/>        |

Remarks

60. EQUIPMENT & SUPPLIES: Suction machines

|                            | Available             | Not Available         | Available but not functional |
|----------------------------|-----------------------|-----------------------|------------------------------|
| Acute care/ Emergency Area | <input type="radio"/> | <input type="radio"/> | <input type="radio"/>        |
| Pediatric ward             | <input type="radio"/> | <input type="radio"/> | <input type="radio"/>        |

Remarks

**61. EQUIPMENT & SUPPLIES: Ambu bag and masks**

|                            | Available             | Not Available         | Available but not functional |
|----------------------------|-----------------------|-----------------------|------------------------------|
| Acute care/ Emergency Area | <input type="radio"/> | <input type="radio"/> | <input type="radio"/>        |
| Pediatric ward             | <input type="radio"/> | <input type="radio"/> | <input type="radio"/>        |

Remarks

**62. EQUIPMENT & SUPPLIES: Oxygen source**

|                            | Available             | Not Available         | Available but not functional |
|----------------------------|-----------------------|-----------------------|------------------------------|
| Acute care/ Emergency Area | <input type="radio"/> | <input type="radio"/> | <input type="radio"/>        |
| Pediatric ward             | <input type="radio"/> | <input type="radio"/> | <input type="radio"/>        |

Remarks

**63. EQUIPMENT & SUPPLIES: Nasal prongs/cannula/catheter**

|                            | Available             | Not Available         | Available but not functional |
|----------------------------|-----------------------|-----------------------|------------------------------|
| Acute care/ Emergency Area | <input type="radio"/> | <input type="radio"/> | <input type="radio"/>        |
| Pediatric ward             | <input type="radio"/> | <input type="radio"/> | <input type="radio"/>        |

Remarks

**64. EQUIPMENT & SUPPLIES: Facemask (simple or non-rebreather)**

|                            | Available             | Not Available         | Available but not functional |
|----------------------------|-----------------------|-----------------------|------------------------------|
| Acute care/ Emergency Area | <input type="radio"/> | <input type="radio"/> | <input type="radio"/>        |
| Pediatric ward             | <input type="radio"/> | <input type="radio"/> | <input type="radio"/>        |

Remarks

#### 65. EQUIPMENT & SUPPLIES: IV administration sets

|                            | Available             | Not Available         | Available but not functional |
|----------------------------|-----------------------|-----------------------|------------------------------|
| Acute care/ Emergency Area | <input type="radio"/> | <input type="radio"/> | <input type="radio"/>        |
| Pediatric ward             | <input type="radio"/> | <input type="radio"/> | <input type="radio"/>        |

Remarks

#### 66. EQUIPMENT & SUPPLIES: Infusion pumps

|                            | Available             | Not Available         | Available but not functional |
|----------------------------|-----------------------|-----------------------|------------------------------|
| Acute care/ Emergency Area | <input type="radio"/> | <input type="radio"/> | <input type="radio"/>        |
| Pediatric ward             | <input type="radio"/> | <input type="radio"/> | <input type="radio"/>        |

Remarks

#### 67. EQUIPMENT & SUPPLIES: Needle system for IV infusion (i.e. butterflies or scalp vein sets)

|                            | Available             | Not Available         | Available but not functional |
|----------------------------|-----------------------|-----------------------|------------------------------|
| Acute care/ Emergency Area | <input type="radio"/> | <input type="radio"/> | <input type="radio"/>        |
| Pediatric ward             | <input type="radio"/> | <input type="radio"/> | <input type="radio"/>        |

List Sizes:

#### 68. EQUIPMENT & SUPPLIES: Intravenous cannulae (angiocaths, jelcos, venflons)

|                            | Available             | Not Available         | Available but not functional |
|----------------------------|-----------------------|-----------------------|------------------------------|
| Acute care/ Emergency Area | <input type="radio"/> | <input type="radio"/> | <input type="radio"/>        |
| Pediatric ward             | <input type="radio"/> | <input type="radio"/> | <input type="radio"/>        |

Remarks

**69. EQUIPMENT & SUPPLIES: Central line kits**

|                            | Available             | Not Available         | Available but not functional |
|----------------------------|-----------------------|-----------------------|------------------------------|
| Acute care/ Emergency Area | <input type="radio"/> | <input type="radio"/> | <input type="radio"/>        |
| Pediatric ward             | <input type="radio"/> | <input type="radio"/> | <input type="radio"/>        |

Remarks

**70. EQUIPMENT & SUPPLIES: Arterial line kits**

|                            | Available             | Not Available         | Available but not functional |
|----------------------------|-----------------------|-----------------------|------------------------------|
| Acute care/ Emergency Area | <input type="radio"/> | <input type="radio"/> | <input type="radio"/>        |
| Pediatric ward             | <input type="radio"/> | <input type="radio"/> | <input type="radio"/>        |

Remarks

**71. EQUIPMENT & SUPPLIES: Blood giving sets**

|                            | Available             | Not Available         | Available but not functional |
|----------------------------|-----------------------|-----------------------|------------------------------|
| Acute care/ Emergency Area | <input type="radio"/> | <input type="radio"/> | <input type="radio"/>        |
| Pediatric ward             | <input type="radio"/> | <input type="radio"/> | <input type="radio"/>        |

Remarks

**72. EQUIPMENT & SUPPLIES: Torch**

|                            | Available             | Not Available         | Available but not functional |
|----------------------------|-----------------------|-----------------------|------------------------------|
| Acute care/ Emergency Area | <input type="radio"/> | <input type="radio"/> | <input type="radio"/>        |
| Pediatric ward             | <input type="radio"/> | <input type="radio"/> | <input type="radio"/>        |

Remarks

### 73. EQUIPMENT & SUPPLIES: Oropharyngeal airways

|                            | Available             | Not Available         | Available but not functional |
|----------------------------|-----------------------|-----------------------|------------------------------|
| Acute care/ Emergency Area | <input type="radio"/> | <input type="radio"/> | <input type="radio"/>        |
| Pediatric ward             | <input type="radio"/> | <input type="radio"/> | <input type="radio"/>        |

Remarks

### 74. EQUIPMENT & SUPPLIES: Oropharyngeal airways

|                            | Available             | Not Available         | Available but not functional |
|----------------------------|-----------------------|-----------------------|------------------------------|
| Acute care/ Emergency Area | <input type="radio"/> | <input type="radio"/> | <input type="radio"/>        |
| Pediatric ward             | <input type="radio"/> | <input type="radio"/> | <input type="radio"/>        |

Remarks

### 75. EQUIPMENT & SUPPLIES: Laryngoscope

|                            | Available             | Not Available         | Available but not functional |
|----------------------------|-----------------------|-----------------------|------------------------------|
| Acute care/ Emergency Area | <input type="radio"/> | <input type="radio"/> | <input type="radio"/>        |
| Pediatric ward             | <input type="radio"/> | <input type="radio"/> | <input type="radio"/>        |

Remarks

### 76. EQUIPMENT & SUPPLIES: Endotracheal tubes (all sizes)

|                            | Available             | Not Available         | Available but not functional |
|----------------------------|-----------------------|-----------------------|------------------------------|
| Acute care/ Emergency Area | <input type="radio"/> | <input type="radio"/> | <input type="radio"/>        |
| Pediatric ward             | <input type="radio"/> | <input type="radio"/> | <input type="radio"/>        |

Remarks

**77. EQUIPMENT & SUPPLIES: Mechanical ventilator**

|                            | Available             | Not Available         | Available but not functional |
|----------------------------|-----------------------|-----------------------|------------------------------|
| Acute care/ Emergency Area | <input type="radio"/> | <input type="radio"/> | <input type="radio"/>        |
| Pediatric ward             | <input type="radio"/> | <input type="radio"/> | <input type="radio"/>        |

Remarks

**78. EQUIPMENT & SUPPLIES: Source of Heat**

|                            | Available             | Not Available         | Available but not functional |
|----------------------------|-----------------------|-----------------------|------------------------------|
| Acute care/ Emergency Area | <input type="radio"/> | <input type="radio"/> | <input type="radio"/>        |
| Pediatric ward             | <input type="radio"/> | <input type="radio"/> | <input type="radio"/>        |

Remarks

**79. EQUIPMENT & SUPPLIES: Thermometer**

|                            | Available             | Not Available         | Available but not functional |
|----------------------------|-----------------------|-----------------------|------------------------------|
| Acute care/ Emergency Area | <input type="radio"/> | <input type="radio"/> | <input type="radio"/>        |
| Pediatric ward             | <input type="radio"/> | <input type="radio"/> | <input type="radio"/>        |

Remarks

**80. EQUIPMENT & SUPPLIES: Naso-gastric tubes**

|                            | Available             | Not Available         | Available but not functional |
|----------------------------|-----------------------|-----------------------|------------------------------|
| Acute care/ Emergency Area | <input type="radio"/> | <input type="radio"/> | <input type="radio"/>        |
| Pediatric ward             | <input type="radio"/> | <input type="radio"/> | <input type="radio"/>        |

Remarks



**81. EQUIPMENT & SUPPLIES: Antiseptic (for cleaning the skin)**

|                            | Available             | Not Available         | Available but not functional |
|----------------------------|-----------------------|-----------------------|------------------------------|
| Acute care/ Emergency Area | <input type="radio"/> | <input type="radio"/> | <input type="radio"/>        |
| Pediatric ward             | <input type="radio"/> | <input type="radio"/> | <input type="radio"/>        |

Remarks

**82. EQUIPMENT & SUPPLIES: Specimen bottles for microbiology**

|                            | Available             | Not Available         | Available but not functional |
|----------------------------|-----------------------|-----------------------|------------------------------|
| Acute care/ Emergency Area | <input type="radio"/> | <input type="radio"/> | <input type="radio"/>        |
| Pediatric ward             | <input type="radio"/> | <input type="radio"/> | <input type="radio"/>        |

Remarks

**83. EQUIPMENT & SUPPLIES: Weighing machines**

|                            | Available             | Not Available         | Available but not functional |
|----------------------------|-----------------------|-----------------------|------------------------------|
| Acute care/ Emergency Area | <input type="radio"/> | <input type="radio"/> | <input type="radio"/>        |
| Pediatric ward             | <input type="radio"/> | <input type="radio"/> | <input type="radio"/>        |

Remarks

**84. EQUIPMENT & SUPPLIES: Dextrose stix and glucometer**

|                            | Available             | Not Available         | Available but not functional |
|----------------------------|-----------------------|-----------------------|------------------------------|
| Acute care/ Emergency Area | <input type="radio"/> | <input type="radio"/> | <input type="radio"/>        |
| Pediatric ward             | <input type="radio"/> | <input type="radio"/> | <input type="radio"/>        |

Remarks

#### 85. EQUIPMENT & SUPPLIES: Blood slides

|                            | Available             | Not Available         | Available but not functional |
|----------------------------|-----------------------|-----------------------|------------------------------|
| Acute care/ Emergency Area | <input type="radio"/> | <input type="radio"/> | <input type="radio"/>        |
| Pediatric ward             | <input type="radio"/> | <input type="radio"/> | <input type="radio"/>        |

Remarks

#### 86. EQUIPMENT & SUPPLIES: LP needles

|                            | Available             | Not Available         | Available but not functional |
|----------------------------|-----------------------|-----------------------|------------------------------|
| Acute care/ Emergency Area | <input type="radio"/> | <input type="radio"/> | <input type="radio"/>        |
| Pediatric ward             | <input type="radio"/> | <input type="radio"/> | <input type="radio"/>        |

Remarks

#### 87. EQUIPMENT & SUPPLIES: Blood gas machine

|                            | Available             | Not Available         | Available but not functional |
|----------------------------|-----------------------|-----------------------|------------------------------|
| Acute care/ Emergency Area | <input type="radio"/> | <input type="radio"/> | <input type="radio"/>        |
| Pediatric ward             | <input type="radio"/> | <input type="radio"/> | <input type="radio"/>        |

Remarks

#### 88. EQUIPMENT & SUPPLIES: Pulse oximeter

|                            | Available             | Not Available         | Available but not functional |
|----------------------------|-----------------------|-----------------------|------------------------------|
| Acute care/ Emergency Area | <input type="radio"/> | <input type="radio"/> | <input type="radio"/>        |
| Pediatric ward             | <input type="radio"/> | <input type="radio"/> | <input type="radio"/>        |

Remarks

**89. EQUIPMENT & SUPPLIES: Blood Pressure Machine (Pedi cuff)**

|                            | Available             | Not Available         | Available but not functional |
|----------------------------|-----------------------|-----------------------|------------------------------|
| Acute care/ Emergency Area | <input type="radio"/> | <input type="radio"/> | <input type="radio"/>        |
| Pediatric ward             | <input type="radio"/> | <input type="radio"/> | <input type="radio"/>        |

Remarks

**90. EQUIPMENT & SUPPLIES: Cardiac monitoring (heart rate, EKG)**

|                            | Available             | Not Available         | Available but not functional |
|----------------------------|-----------------------|-----------------------|------------------------------|
| Acute care/ Emergency Area | <input type="radio"/> | <input type="radio"/> | <input type="radio"/>        |
| Pediatric ward             | <input type="radio"/> | <input type="radio"/> | <input type="radio"/>        |

Remarks

**91. EQUIPMENT & SUPPLIES: EKG machine**

|                            | Available             | Not Available         | Available but not functional |
|----------------------------|-----------------------|-----------------------|------------------------------|
| Acute care/ Emergency Area | <input type="radio"/> | <input type="radio"/> | <input type="radio"/>        |
| Pediatric ward             | <input type="radio"/> | <input type="radio"/> | <input type="radio"/>        |

Remarks

**92. EQUIPMENT & SUPPLIES: Portable Chest radiograph**

|                            | Available             | Not Available         | Available but not functional |
|----------------------------|-----------------------|-----------------------|------------------------------|
| Acute care/ Emergency Area | <input type="radio"/> | <input type="radio"/> | <input type="radio"/>        |
| Pediatric ward             | <input type="radio"/> | <input type="radio"/> | <input type="radio"/>        |

Remarks

### 93. EQUIPMENT & SUPPLIES: Clean water supply

|                            | Available             | Not Available         | Available but not functional |
|----------------------------|-----------------------|-----------------------|------------------------------|
| Acute care/ Emergency Area | <input type="radio"/> | <input type="radio"/> | <input type="radio"/>        |
| Pediatric ward             | <input type="radio"/> | <input type="radio"/> | <input type="radio"/>        |

Remarks

### 94. DRUGS: Diazepam

|                            | Available             | Not Available         | Available but not functional |
|----------------------------|-----------------------|-----------------------|------------------------------|
| Acute care/ Emergency Area | <input type="radio"/> | <input type="radio"/> | <input type="radio"/>        |
| Pediatric ward             | <input type="radio"/> | <input type="radio"/> | <input type="radio"/>        |

Remarks

### 95. DRUGS: Glucose 5%

|                            | Available             | Not Available         | Available but not functional |
|----------------------------|-----------------------|-----------------------|------------------------------|
| Acute care/ Emergency Area | <input type="radio"/> | <input type="radio"/> | <input type="radio"/>        |
| Pediatric ward             | <input type="radio"/> | <input type="radio"/> | <input type="radio"/>        |

Remarks

### 96. DRUGS: Glucose 25%

|                            | Available             | Not Available         | Available but not functional |
|----------------------------|-----------------------|-----------------------|------------------------------|
| Acute care/ Emergency Area | <input type="radio"/> | <input type="radio"/> | <input type="radio"/>        |
| Pediatric ward             | <input type="radio"/> | <input type="radio"/> | <input type="radio"/>        |

Remarks

### 97. DRUGS: Glucose 10%

|                            | Available             | Not Available         | Available but not functional |
|----------------------------|-----------------------|-----------------------|------------------------------|
| Acute care/ Emergency Area | <input type="radio"/> | <input type="radio"/> | <input type="radio"/>        |
| Pediatric ward             | <input type="radio"/> | <input type="radio"/> | <input type="radio"/>        |

Remarks

### 98. DRUGS: Oral rehydration solution

|                            | Available             | Not Available         | Available but not functional |
|----------------------------|-----------------------|-----------------------|------------------------------|
| Acute care/ Emergency Area | <input type="radio"/> | <input type="radio"/> | <input type="radio"/>        |
| Pediatric ward             | <input type="radio"/> | <input type="radio"/> | <input type="radio"/>        |

Remarks

### 99. DRUGS: Benzyl Penicillin

|                            | Available             | Not Available         | Available but not functional |
|----------------------------|-----------------------|-----------------------|------------------------------|
| Acute care/ Emergency Area | <input type="radio"/> | <input type="radio"/> | <input type="radio"/>        |
| Pediatric ward             | <input type="radio"/> | <input type="radio"/> | <input type="radio"/>        |

Remarks

### 100. DRUGS: Vancomycin

|                            | Available             | Not Available         | Available but not functional |
|----------------------------|-----------------------|-----------------------|------------------------------|
| Acute care/ Emergency Area | <input type="radio"/> | <input type="radio"/> | <input type="radio"/>        |
| Pediatric ward             | <input type="radio"/> | <input type="radio"/> | <input type="radio"/>        |

Remarks

#### 101. DRUGS: Gentamicin

|                            | Available             | Not Available         | Available but not functional |
|----------------------------|-----------------------|-----------------------|------------------------------|
| Acute care/ Emergency Area | <input type="radio"/> | <input type="radio"/> | <input type="radio"/>        |
| Pediatric ward             | <input type="radio"/> | <input type="radio"/> | <input type="radio"/>        |

Remarks

#### 102. DRUGS: Ceftriaxone

|                            | Available             | Not Available         | Available but not functional |
|----------------------------|-----------------------|-----------------------|------------------------------|
| Acute care/ Emergency Area | <input type="radio"/> | <input type="radio"/> | <input type="radio"/>        |
| Pediatric ward             | <input type="radio"/> | <input type="radio"/> | <input type="radio"/>        |

Remarks

#### 103. DRUGS: Chloramphenicol injection

|                            | Available             | Not Available         | Available but not functional |
|----------------------------|-----------------------|-----------------------|------------------------------|
| Acute care/ Emergency Area | <input type="radio"/> | <input type="radio"/> | <input type="radio"/>        |
| Pediatric ward             | <input type="radio"/> | <input type="radio"/> | <input type="radio"/>        |

Remarks

#### 104. DRUGS: Quinine injection

|                            | Available             | Not Available         | Available but not functional |
|----------------------------|-----------------------|-----------------------|------------------------------|
| Acute care/ Emergency Area | <input type="radio"/> | <input type="radio"/> | <input type="radio"/>        |
| Pediatric ward             | <input type="radio"/> | <input type="radio"/> | <input type="radio"/>        |

Remarks

### 105. DRUGS: Adrenaline (epinephrine)

|                            | Available             | Not Available         | Available but not functional |
|----------------------------|-----------------------|-----------------------|------------------------------|
| Acute care/ Emergency Area | <input type="radio"/> | <input type="radio"/> | <input type="radio"/>        |
| Pediatric ward             | <input type="radio"/> | <input type="radio"/> | <input type="radio"/>        |

List concentration

### 106. DRUGS: Hydrocortisone

|                            | Available             | Not Available         | Available but not functional |
|----------------------------|-----------------------|-----------------------|------------------------------|
| Acute care/ Emergency Area | <input type="radio"/> | <input type="radio"/> | <input type="radio"/>        |
| Pediatric ward             | <input type="radio"/> | <input type="radio"/> | <input type="radio"/>        |

Remarks

### 107. DRUGS: Normal Saline

|                            | Available             | Not Available         | Available but not functional |
|----------------------------|-----------------------|-----------------------|------------------------------|
| Acute care/ Emergency Area | <input type="radio"/> | <input type="radio"/> | <input type="radio"/>        |
| Pediatric ward             | <input type="radio"/> | <input type="radio"/> | <input type="radio"/>        |

Remarks

### 108. DRUGS: Hartmann's Solution

|                            | Available             | Not Available         | Available but not functional |
|----------------------------|-----------------------|-----------------------|------------------------------|
| Acute care/ Emergency Area | <input type="radio"/> | <input type="radio"/> | <input type="radio"/>        |
| Pediatric ward             | <input type="radio"/> | <input type="radio"/> | <input type="radio"/>        |

Remarks

### 109. DRUGS: Artemisinin

|                            | Available             | Not Available         | Available but not functional |
|----------------------------|-----------------------|-----------------------|------------------------------|
| Acute care/ Emergency Area | <input type="radio"/> | <input type="radio"/> | <input type="radio"/>        |
| Pediatric ward             | <input type="radio"/> | <input type="radio"/> | <input type="radio"/>        |

Remarks

### 110. DRUGS: Tab Quinine

|                            | Available             | Not Available         | Available but not functional |
|----------------------------|-----------------------|-----------------------|------------------------------|
| Acute care/ Emergency Area | <input type="radio"/> | <input type="radio"/> | <input type="radio"/>        |
| Pediatric ward             | <input type="radio"/> | <input type="radio"/> | <input type="radio"/>        |

Remarks

### 111. DRUGS: Cotrimoxazole

|                            | Available             | Not Available         | Available but not functional |
|----------------------------|-----------------------|-----------------------|------------------------------|
| Acute care/ Emergency Area | <input type="radio"/> | <input type="radio"/> | <input type="radio"/>        |
| Pediatric ward             | <input type="radio"/> | <input type="radio"/> | <input type="radio"/>        |

Remarks

### 112. DRUGS: Furosemide

|                            | Available             | Not Available         | Available but not functional |
|----------------------------|-----------------------|-----------------------|------------------------------|
| Acute care/ Emergency Area | <input type="radio"/> | <input type="radio"/> | <input type="radio"/>        |
| Pediatric ward             | <input type="radio"/> | <input type="radio"/> | <input type="radio"/>        |

Remarks



### 113. DRUGS: Calcium gluconate

|                            | Available             | Not Available         | Available but not functional |
|----------------------------|-----------------------|-----------------------|------------------------------|
| Acute care/ Emergency Area | <input type="radio"/> | <input type="radio"/> | <input type="radio"/>        |
| Pediatric ward             | <input type="radio"/> | <input type="radio"/> | <input type="radio"/>        |

Remarks

### 114. DRUGS: Sodium bicarbonate

|                            | Available             | Not Available         | Available but not functional |
|----------------------------|-----------------------|-----------------------|------------------------------|
| Acute care/ Emergency Area | <input type="radio"/> | <input type="radio"/> | <input type="radio"/>        |
| Pediatric ward             | <input type="radio"/> | <input type="radio"/> | <input type="radio"/>        |

Remarks

### 115. DRUGS: Other Drug #1

|                            | Available             | Not Available         | Available but not functional |
|----------------------------|-----------------------|-----------------------|------------------------------|
| Acute care/ Emergency Area | <input type="radio"/> | <input type="radio"/> | <input type="radio"/>        |
| Pediatric ward             | <input type="radio"/> | <input type="radio"/> | <input type="radio"/>        |

Specify other drug

### 116. DRUGS: Other Drug # 2

|                            | Available             | Not Available         | Available but not functional |
|----------------------------|-----------------------|-----------------------|------------------------------|
| Acute care/ Emergency Area | <input type="radio"/> | <input type="radio"/> | <input type="radio"/>        |
| Pediatric ward             | <input type="radio"/> | <input type="radio"/> | <input type="radio"/>        |

Specify other drug

117. DRUGS: Other Drug # 3

|                            | Available             | Not Available         | Available but not functional |
|----------------------------|-----------------------|-----------------------|------------------------------|
| Acute care/ Emergency Area | <input type="radio"/> | <input type="radio"/> | <input type="radio"/>        |
| Pediatric ward             | <input type="radio"/> | <input type="radio"/> | <input type="radio"/>        |

Specify other drug

118. DRUGS: Other Drug # 4

|                            | Available             | Not Available         | Available but not functional |
|----------------------------|-----------------------|-----------------------|------------------------------|
| Acute care/ Emergency Area | <input type="radio"/> | <input type="radio"/> | <input type="radio"/>        |
| Pediatric ward             | <input type="radio"/> | <input type="radio"/> | <input type="radio"/>        |

Specify other drug

ASSESSMENT OF LABORATORY RESOURCES

119. Is the laboratory 24 hours?

☐ Yes

☐ No

## 120. What hours is it open?

Time Labs Opens (In 24hr)

Time Labs Closes (In 24hr)

## 121. Which of the following tests are done in the laboratory?

|                                | Yes - Available 24 hr | Yes, but not available 24 hr | No                    |
|--------------------------------|-----------------------|------------------------------|-----------------------|
| Blood sugar                    | <input type="radio"/> | <input type="radio"/>        | <input type="radio"/> |
| Blood slide                    | <input type="radio"/> | <input type="radio"/>        | <input type="radio"/> |
| Blood film                     | <input type="radio"/> | <input type="radio"/>        | <input type="radio"/> |
| Hemoglobin/ PCV                | <input type="radio"/> | <input type="radio"/>        | <input type="radio"/> |
| WBC count                      | <input type="radio"/> | <input type="radio"/>        | <input type="radio"/> |
| CSF microscopy                 | <input type="radio"/> | <input type="radio"/>        | <input type="radio"/> |
| Urine microscopy               | <input type="radio"/> | <input type="radio"/>        | <input type="radio"/> |
| Blood grouping and cross match | <input type="radio"/> | <input type="radio"/>        | <input type="radio"/> |
| Blood culture                  | <input type="radio"/> | <input type="radio"/>        | <input type="radio"/> |
| Urine culture                  | <input type="radio"/> | <input type="radio"/>        | <input type="radio"/> |
| CSF culture                    | <input type="radio"/> | <input type="radio"/>        | <input type="radio"/> |
| Other                          | <input type="radio"/> | <input type="radio"/>        | <input type="radio"/> |

Other Lab Test Specify
